# Supplementary material
Source: publisher figshare collection journal article supplement (https://acs.figshare.com/ndownloader/files/11657783)
Supplement: Supplementary file 1 [file 11657783]

## Supporting Information

### Ultrafast, Continuous and Shape-controlled Preparation of CeO<sub>2</sub> Nanostructures: nanorods and nanocubes in a Microfluidic System

Hongbao Yao<sup>a</sup>, Yujun Wang<sup>a,\*1</sup>, Yu Jing<sup>a,\*2</sup>, Guangsheng Luo<sup>a</sup>

*<sup>a</sup>State Key Laboratory of Chemical Engineering, Department of Chemical Engineering, Tsinghua University, Beijing 100084, China*

Corresponding author<sup>\*1</sup>: Tel: 86-10-62798447, Fax: 86-10-62770304

Email address: [wangyujun@mail.tsinghua.edu.cn](mailto:wangyujun@mail.tsinghua.edu.cn)

Corresponding author<sup>\*2</sup>: Tel: 86-10-62795335, Fax: 86-10-62770304

Email address: [jingyuthu@163.com](mailto:jingyuthu@163.com)

## 1. SEAD pattern of different CeO<sub>2</sub> sample

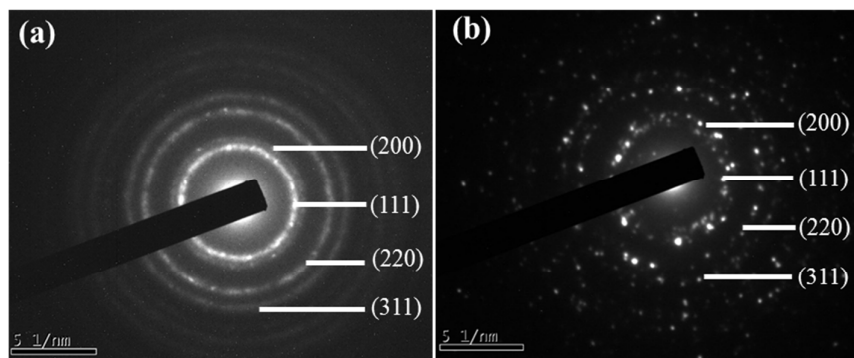

Fig. S1 SEAD pattern of (a) CeO<sub>2\_r</sub>, (b) CeO<sub>2\_c</sub>.

## 2. Comparison with CeO<sub>2</sub> nanorods prepared by different methods

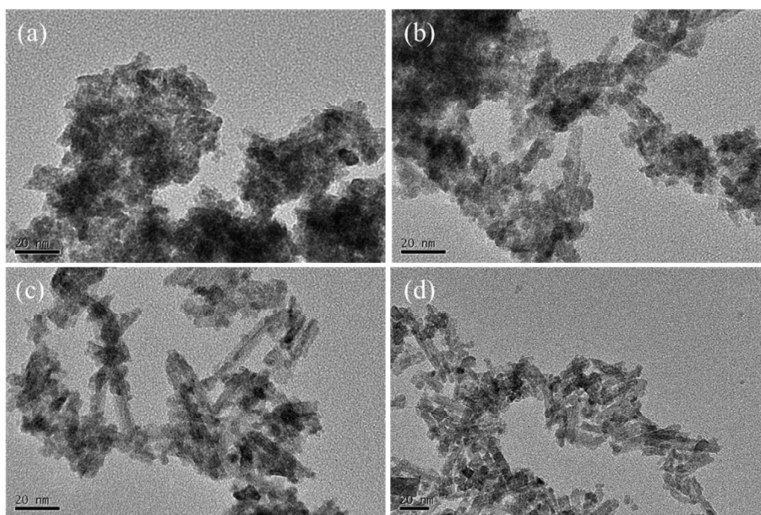

Fig. S2 TEM images of CeO<sub>2</sub> nanorods prepared under different reaction time using traditional hydrothermal methods: (a) 15 min, (b) 30 min, (c) 1 h, and (d) 2 h [reaction temperature: 150 °C, Ce(NO<sub>3</sub>)<sub>3</sub> initial concentration: 0.05 mol/L, NaOH initial concentration: 2 mol/L].

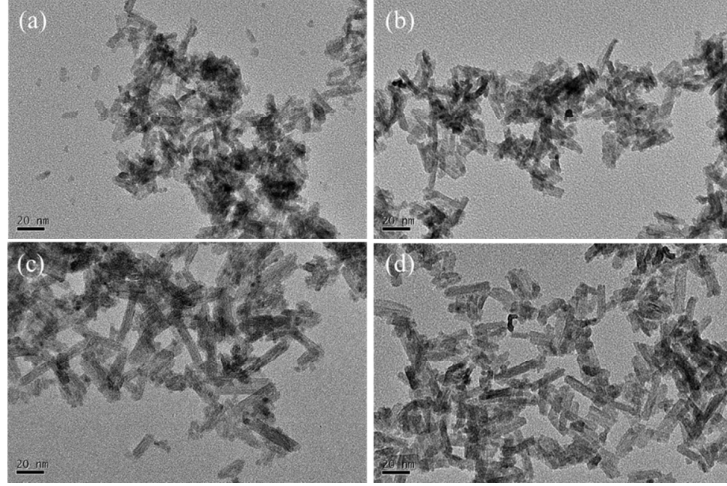

Fig. S3 TEM images of CeO<sub>2</sub> nanorods prepared under different reaction time using our microfluidic system: (a) 1 min, (b) 2 min, (c) 3.5 min, and (d) 8 min [reaction temperature: 150 °C, continuous phase: Ce(NO<sub>3</sub>)<sub>3</sub>, concentration: 0.05 mol/L; dispersed phase: NaOH, concentration: 2 mol/L, fixed phase ratio 1:1, flow rate changing from 5 mL/min to 20 mL/min to obtain different residence time].

### 3. TEM image of the CeO<sub>2</sub>\_np sample

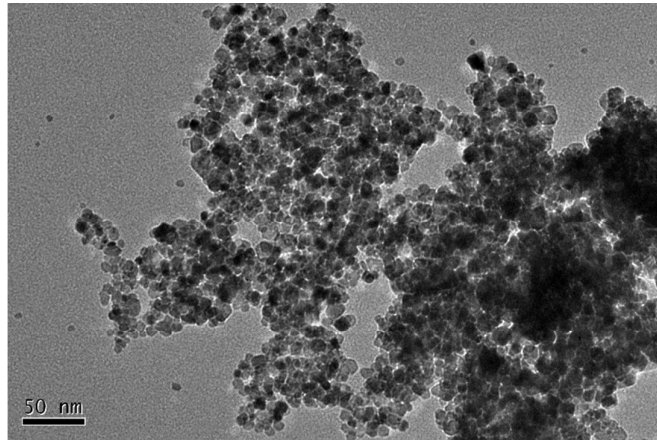

Fig. S4 TEM image of the CeO<sub>2</sub>\_np sample.

### 4. Determination of surficial Ce(III) concentration of CeO<sub>2</sub> based on XPS

It is generally considered that the deconvolution of the Ce 3d fine XPS spectrum could be labeled as two pairs of doublets ( $v_0/u_0$  and  $v'/u'$ ) and three pairs of doublets ( $v/u$ ,  $v''/u''$  and  $v'''/u'''$ ), in which  $v^n$  and  $u^n$  refer to the 3d<sub>5/2</sub> and 3d<sub>3/2</sub> spin-orbit component of cerium ions,

respectively <sup>1-4</sup>. Accordingly, the peaks at  $v_0$ ,  $v'$ ,  $u_0$  and  $u'$  (880.4, 885.5, 898.8, 903.7±0.7 eV) represent the presence of  $Ce^{3+}$ , while the characteristic peaks of  $Ce^{4+}$  are located at  $v$ ,  $v''$ ,  $v'''$ ,  $u$ ,  $u''$  and  $u'''$  (882.7, 888.96, 898.2, 901.3, 907, 916.7±0.7 eV) <sup>5-7</sup>.

Thus, the relative  $Ce^{3+}$  concentration in the catalysts can be determined by calculating the relative integrated area ratios based on Equation (S1):

$$[Ce^{3+}] = \frac{A_{v'} + A_{v_0} + A_{u'} + A_{u_0}}{A_{v'} + A_{v_0} + A_{u'} + A_{u_0} + A_{v''} + A_{v'''} + A_{u''} + A_{u'''}} \quad (S1)$$

where  $A_i$  is the integration area of peak “ $i$ ”.

## 5. O1s XPS spectra of CeO<sub>2</sub>\_np, CeO<sub>2</sub>\_nr and CeO<sub>2</sub>\_nc samples

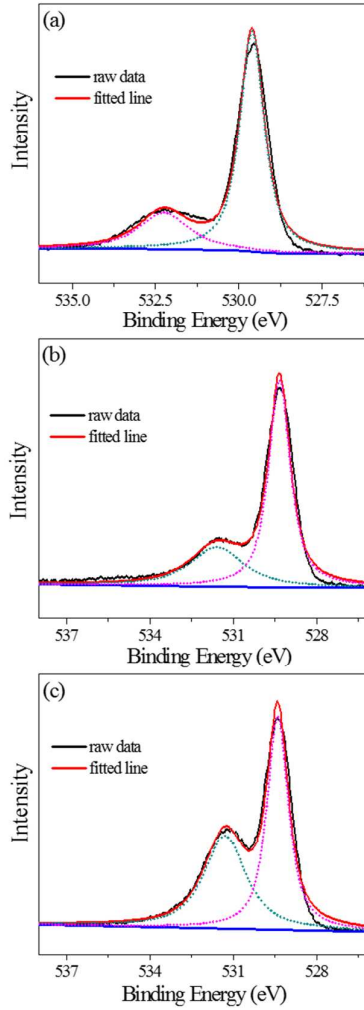

Fig. S5 O1s XPS spectra of (a) CeO<sub>2</sub>\_np, (b) CeO<sub>2</sub>\_nr and (c) CeO<sub>2</sub>\_nc, respectively.

## 6. Computational details

All calculations presented in this work were carried out at the DFT+U level using the Materials Studio program. Projector-augmented wave (PAW) method was employed to describe the interactions between the atomic core and valence electrons (i.e., 5s, 5p, 5d, 4f and 6s electrons for Ce atoms, and 2s and 2p for O atoms) with a kinetic energy cutoff of 500 eV<sup>8,9</sup>. The exchange correlation functional is the generalized gradient approximation, GGA, of Perdew and Wang, PW91<sup>10</sup>. A U value of 5.0 eV was selected based on previous theoretical studies<sup>11,12</sup>.

The (111), (110), and (100) surfaces were modeled as (2×2) periodically repeated slabs consisting of 12, 7, and 9 atomic layers, respectively, separated by 15 Å of vacuum space to prevent unphysical interactions between the slab and its periodic images perpendicular to the surface<sup>13</sup>. Fig. S4 shows the models used for bulk CeO<sub>2</sub>, (111), (110) and (100) surface systems, respectively. Oxygen vacancies were generated on both sides of the slab to ensure that the slab has no net dipole. The total oxygen vacancy formation energy ( $E_{vac}$ ) was defined as:

$$E_{vac} = E_{slab/vac} - E_{slab} + \frac{1}{2n} E_{O_2}$$

Where  $E_{slab}$  is the total energy of the slab,  $E_{slab/vac}$  is the total energy of the slab with oxygen atoms partially removed,  $E_{O_2}$  is the total energy of a gas phase O<sub>2</sub> molecule and n is the number of oxygen atoms removed.

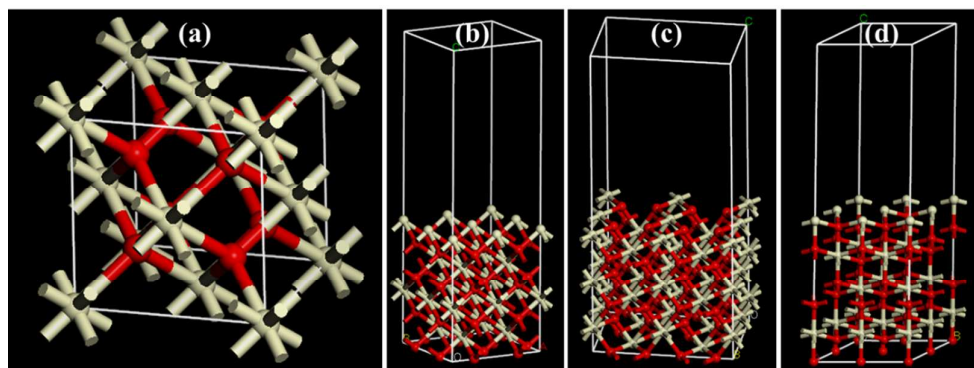

Fig. S6 models used for (a) bulk CeO<sub>2</sub>, (b) (100), (c) (110) and (d) (111) surface systems, respectively.

## Reference

- Holgado, J. P.; Alvarez, R.; Munuera, G., Study of CeO<sub>2</sub> XPS spectra by factor analysis: reduction of CeO<sub>2</sub>. *Appl. Surf. Sci.* **2000**, 161, (3-4), 301-315.
- Korsvik, C.; Patil, S.; Seal, S.; Self, W. T., Superoxide dismutase mimetic properties exhibited by vacancy engineered ceria nanoparticles. *Chem. Commun.* **2007**, (10), 1056-1058.

3. Dutta, P.; Pal, S.; Seehra, M. S.; Shi, Y.; Eyring, E. M.; Ernst, R. D., Concentration of  $\text{Ce}^{3+}$  and oxygen vacancies in cerium oxide nanoparticles. *Chem. Mater.* **2006**, 18, (21), 5144-5146.
4. Watanabe, S.; Ma, X.; Song, C., Characterization of Structural and Surface Properties of Nanocrystalline  $\text{TiO}_2$ - $\text{CeO}_2$  Mixed Oxides by XRD, XPS, TPR, and TPD. *J. Phys. Chem. C* **2009**, 113, (32), 14249-14257.
5. Paparazzo, E.; Ingo, G. M.; Zacchetti, N., X-ray-induced reduction effects at  $\text{CeO}_2$  surfaces - an x-ray photoelectron-spectroscopy study. *J. Vac. Sci. Technol., A* **1991**, 9, (3), 1416-1420.
6. Mullins, D. R.; Overbury, S. H.; Huntley, D. R., Electron spectroscopy of single crystal and polycrystalline cerium oxide surfaces. *Surf. Sci.* **1998**, 409, (2), 307-319.
7. Kumar, A.; Babu, S.; Karakoti, A. S.; Schulte, A.; Seal, S., Luminescence Properties of Europium-Doped Cerium Oxide Nanoparticles: Role of Vacancy and Oxidation States. *Langmuir* **2009**, 25, (18), 10998-11007.
8. Yin, L.-L.; Lu, G.; Gong, X.-Q., A DFT plus U study on the oxidative chlorination of  $\text{CH}_4$  at ceria: the role of HCl. *Catal. Sci. Technol.* **2017**, 7, (12), 2498-2505.
9. Yang, Z. X.; Woo, T. K.; Baudin, M.; Hermansson, K., Atomic and electronic structure of unreduced and reduced  $\text{CeO}_2$  surfaces: A first-principles study. *J. Chem. Phys.* **2004**, 120, (16), 7741-7749.
10. Canadell, E., *Electronic Structure of Solids*. John Wiley & Sons, Ltd: 2006; p 293-309.
11. Capdevila-Cortada, M.; Garcia-Melchor, M.; Lopez, N., Unraveling the structure sensitivity in methanol conversion on  $\text{CeO}_2$ : A DFT + U study. *J. Catal.* **2015**, 327, 58-64.
12. Nolan, M.; Parker, S. C.; Watson, G. W., The electronic structure of oxygen vacancy defects at the low index surfaces of ceria. *Surf. Sci.* **2005**, 595, (1), 223-232.
13. Nolan, M.; Grigoleit, S.; Sayle, D. C.; Parker, S. C.; Watson, G. W., Density functional theory studies of the structure and electronic structure of pure and defective low index surfaces of ceria. *Surf. Sci.* **2005**, 576, (1-3), 217-229.
